# Supplementary material for: Comparison of chemical, ultrasonic and thermal regeneration of carbon nanotubes for acetaminophen, ibuprofen, and triclosan adsorption
Source: Royal Society of Chemistry journal article supplement (doi:10.1039/c7ra08812d), 2017-01-01
Supplement: c7ra08812d1.pdf [file c7ra08812d1.pdf]

Supporting Information for

**Comparison of chemical, ultrasonic and thermal  
regeneration of carbon nanotubes for  
acetaminophen, ibuprofen, and triclosan  
adsorption**

Manuscript to be submitted to *RSC Advances*

11/11/17

**Yifei Wang<sup>†</sup>, Xiuming Wei<sup>†</sup>, Ruochu Zhang<sup>†</sup>, Yingfeng Wu<sup>†</sup>, Muhammad**

**Usman Farid<sup>‡</sup>, and Haiou Huang<sup>†\*</sup>**

<sup>†</sup> State Key Joint Laboratory of Environmental Simulation and Pollution Control,  
School of Environment, Beijing Normal University, No. 19, Xijiekouwai Street,  
Beijing 100875, China.

<sup>‡</sup> School of Energy and Environment, City University of Hong Kong, Tat Chee  
Avenue Kowloon, Hong Kong, China.

\* Department of Environmental Health Sciences, Bloomberg School of Public  
Health, The John Hopkins University, 615 North Wolfe Street, MD 21205, USA.

\* Corresponding authors. phone: +86 10 5880 7743. fax: +86 10 5880 7743. Email:

huanghaiou@bnu.edu.cn (H. Huang)

**Summary:**

**8 pages, including title page, 7 figures**

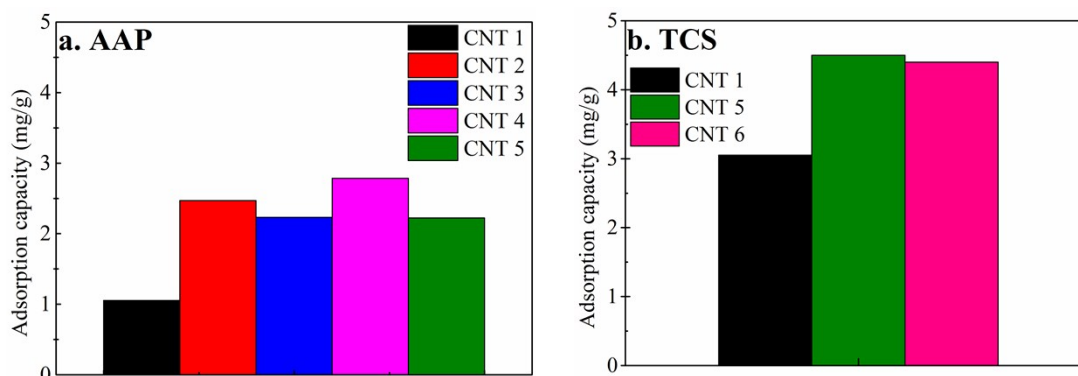

**Figure S1.** Comparison of the adsorption capacities of different carbon nanotubes for (a) acetaminophen and (b) triclosan. CNT1 was employed in this study for the evaluation of CNT adsorption/regeneration in a relatively short period.

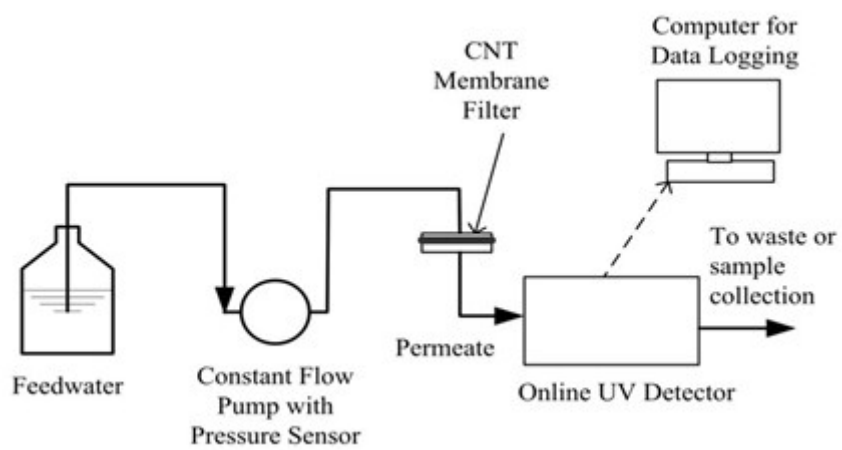

**Figure S2.** Schematic diagram of the bench-scale filtration system used in the chemical regeneration study.

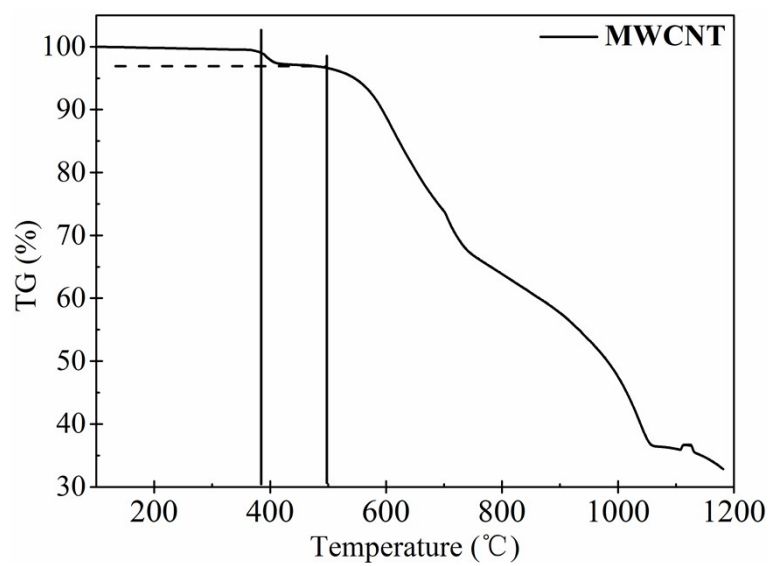

**Figure S3.** Thermogravimetric analysis of the MWCNT used in this study.



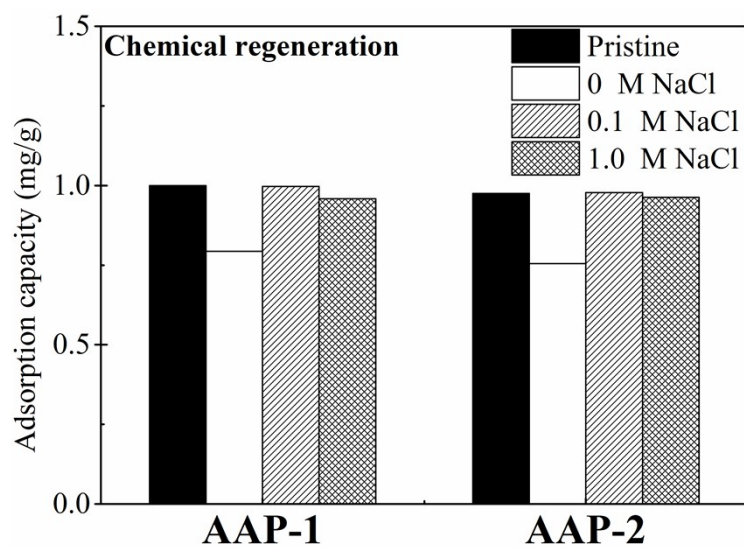

**Figure S4.** Duplicate experimental runs for AAP adsorption onto the MWCNT chemical regenerated with NaCl solutions of different spiked concentrations. The results indicate that the regeneration efficiency followed the order of 0.1 M NaCl  $\geq$  1.0 M NaCl > ultrapure water (0 M NaCl) at the end of 45-min filtration. Feed concentration of each PPCP compound = 1 mg L<sup>-1</sup>, pH = 7.0, CNT mass = 30 mg, and temperature = 25  $\pm$  2 °C.

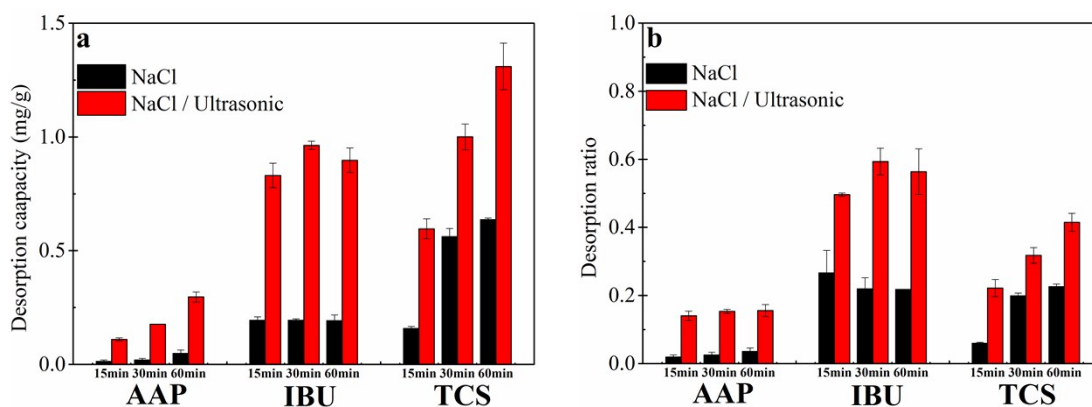

**Figure S5.** Comparison of (a) desorbed amount and (b) desorption ratio of acetaminophen, ibuprofen and triclosan with/without 15 min to 60 min of ultrasonic treatment. Feed concentration of each PPCP compound =  $1 \text{ mg L}^{-1}$ , pH = 7.0, CNT mass = 30 mg, temperature =  $25 \pm 2 \text{ }^\circ\text{C}$ .

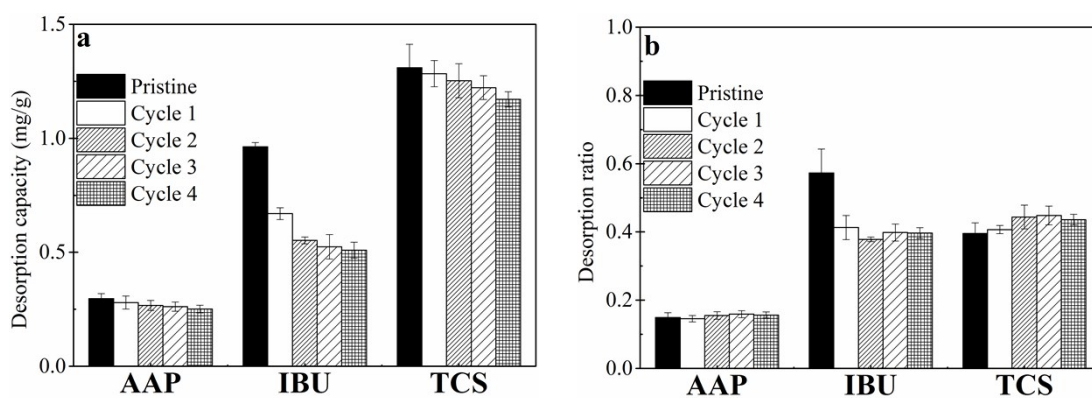

**Figure S6.** Comparison of (a) desorbed amount and (b) desorption ratio of acetaminophen, ibuprofen and triclosan obtained in five consecutive filtration/regeneration circles with ultrasonic treatment at the pre-determined regeneration time, respectively. PPCP concentration in the feed solution = 1 mg L<sup>-1</sup>, pH = 7.0, CNT mass = 30 mg, and temperature = 25 ± 2 °C.



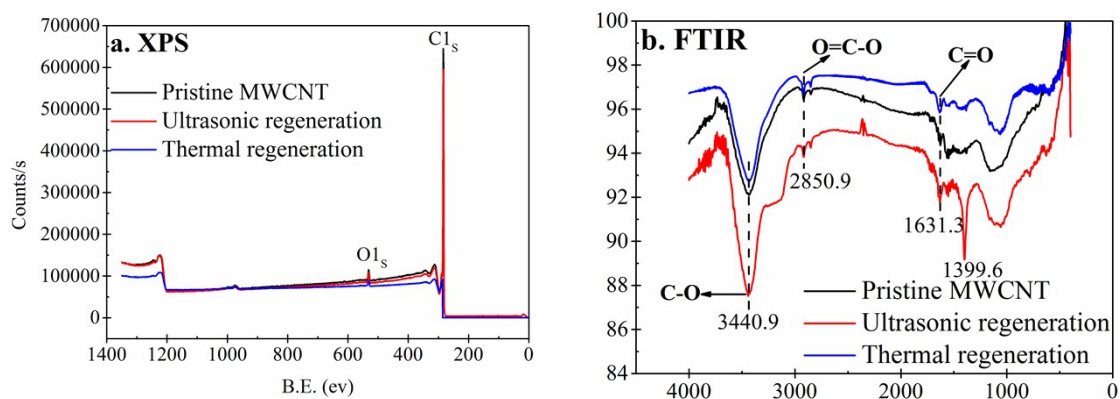

**Figure S7.** (a) X-ray photoelectron spectroscopy (XPS) and (b) Fourier transform infrared spectrometry (FTIR) results for the pristine and the regenerated MWCNT samples.
